# Supplementary material
Source: ML conference proceedings conference paper supplement (https://openaccess.thecvf.com/content/CVPR2023/html/Choi_Restoration_of_Hand-Drawn_CVPR_2023_paper.html)
Supplement: Supplementary file 1 [file Choi_Restoration_of_Hand-Drawn_CVPR_2023_supplemental.pdf]

## Appendix

In the main paper, we proposed a restoration method for aged hand-drawn architectural drawings. We present additional restoration results on aged drawings in Figure 10 and Figure 11 for qualitative evaluation.

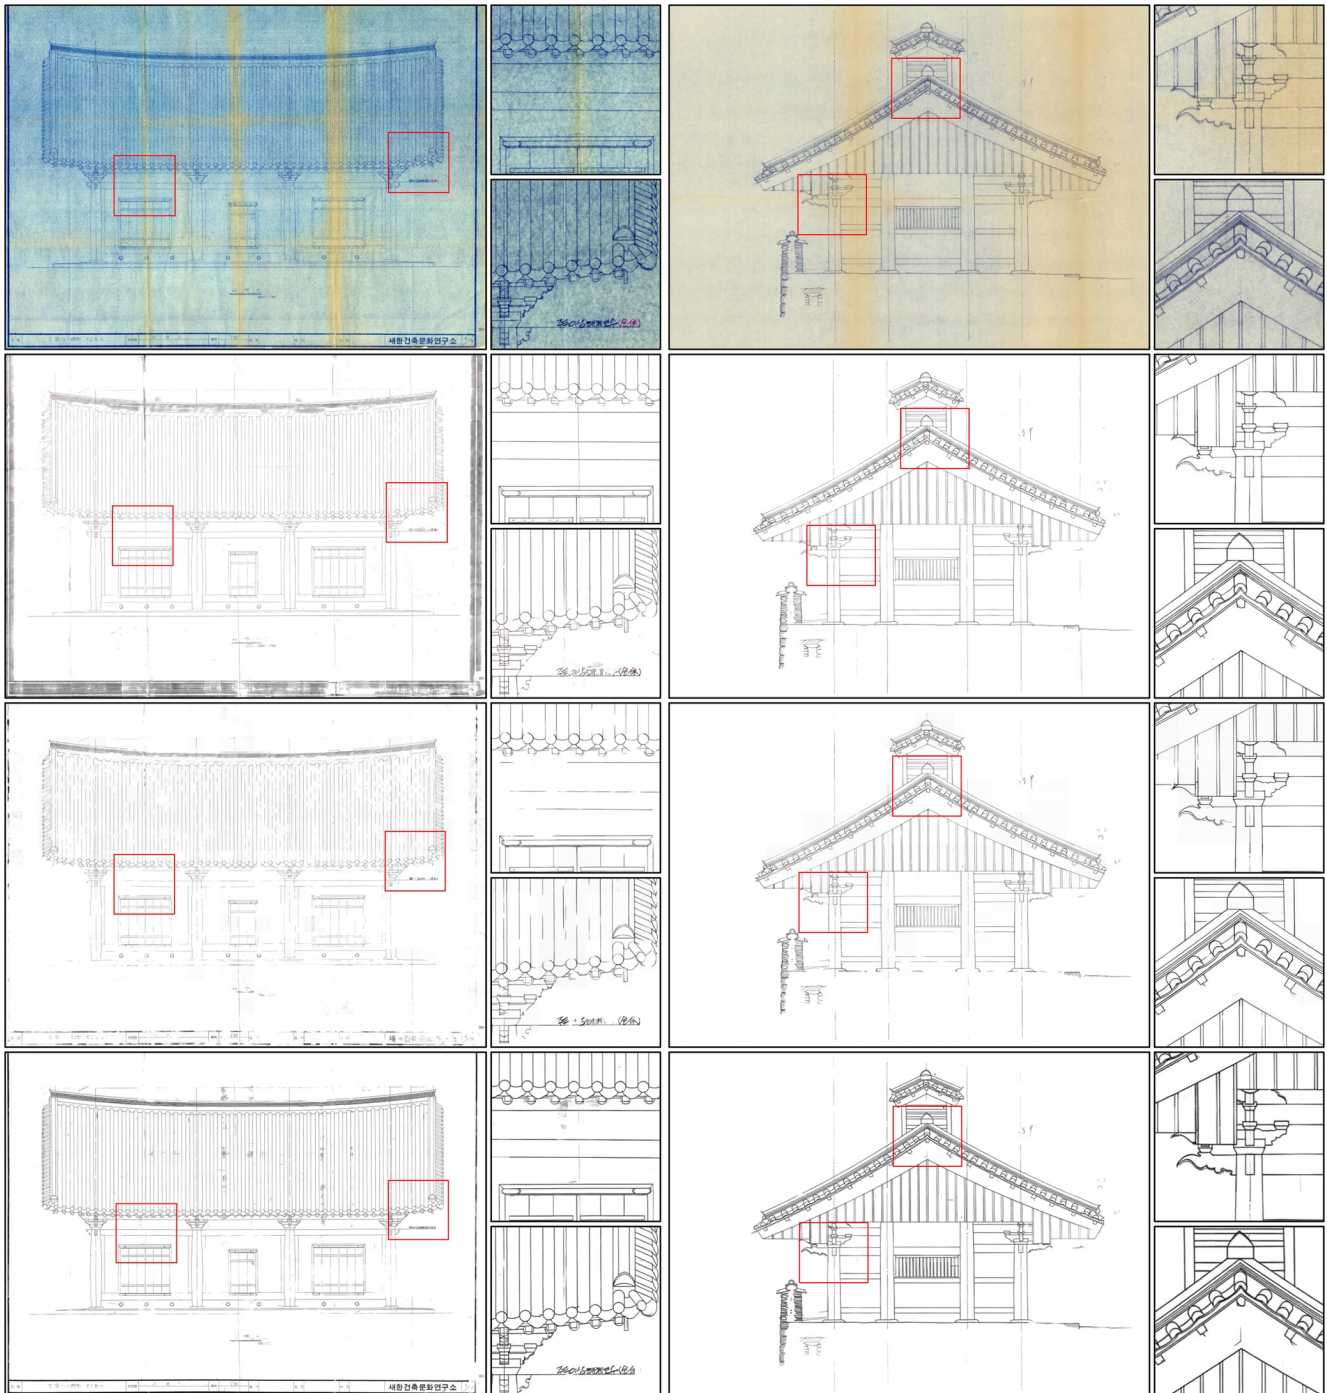

Figure 10. Restoration of aged archived drawings. From top to bottom: archived drawings, Yue *et al.*, Wan *et al.*, and proposed (RVQ-DG).

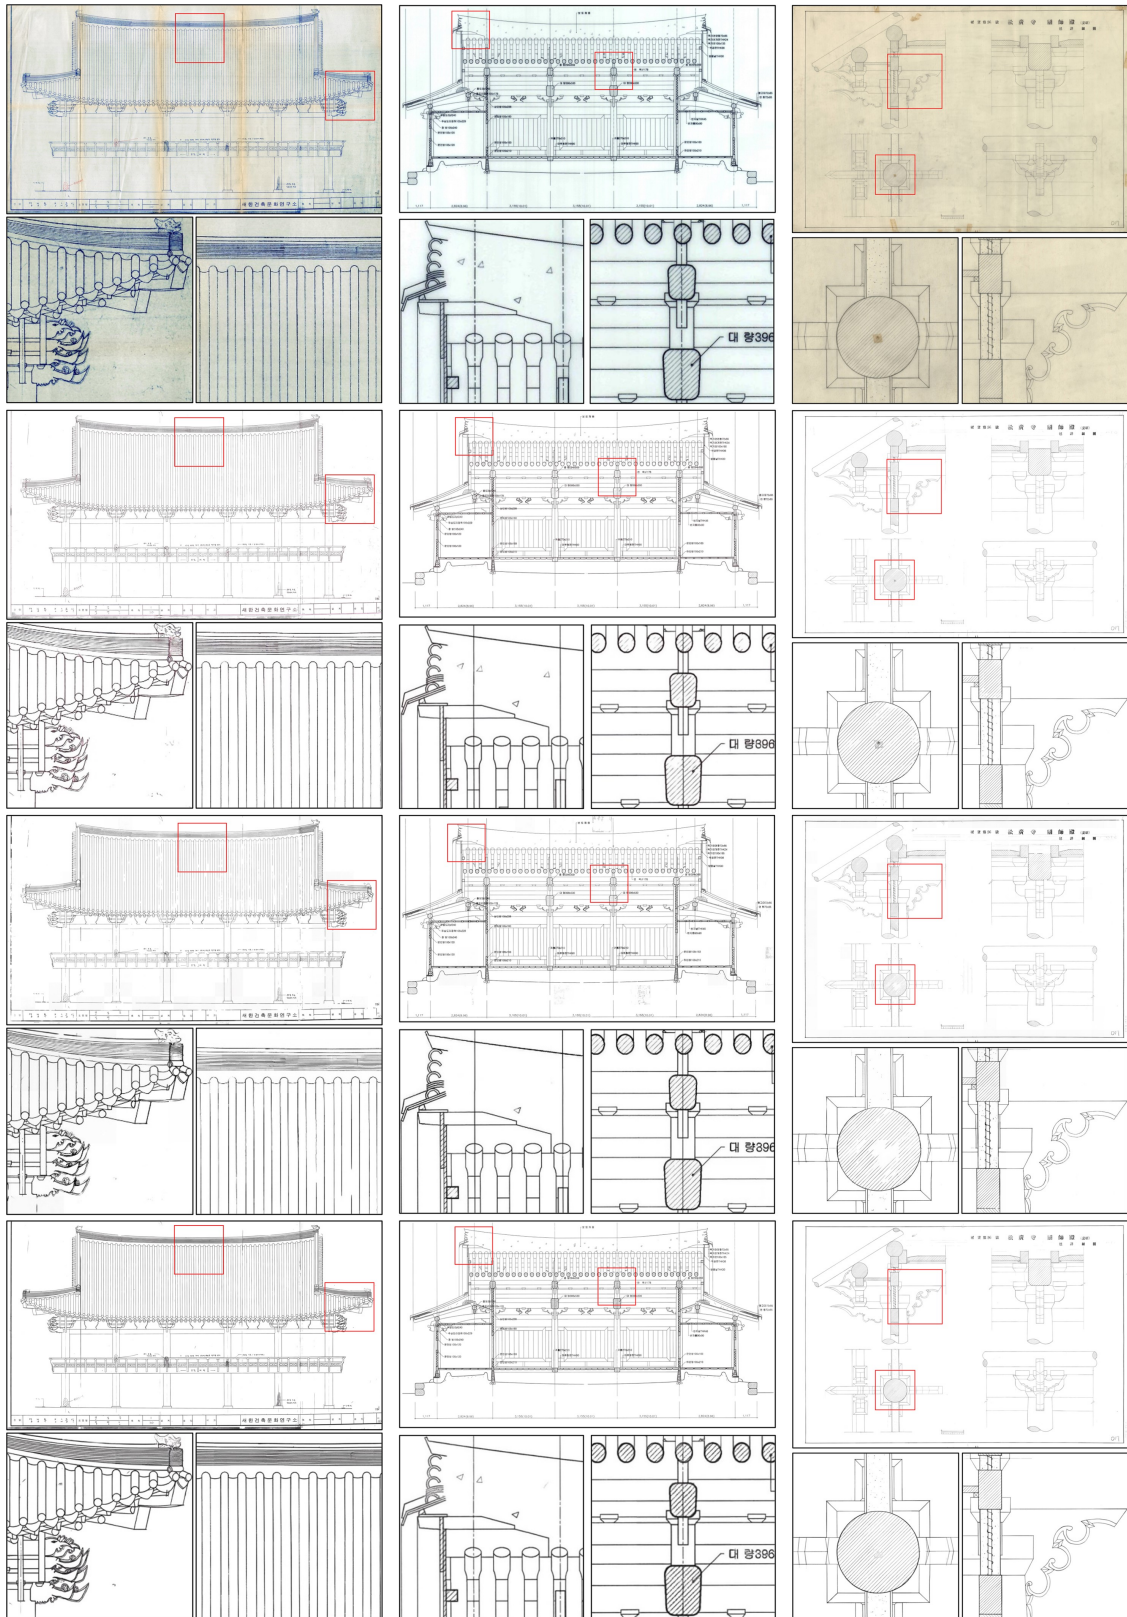

Figure 11. Restoration of aged archived drawings. From top to bottom: archived drawings, Yue *et al.*, Wan *et al.*, and proposed (RVQ-DG).
